# Supplementary material
Source: publisher figshare collection journal article supplement (https://acs.figshare.com/ndownloader/files/5665887)
Supplement: Supplementary file 1 [file 5665887]

data_E-2aa

_audit_creation_method            SHELXL
_chemical_name_systematic
;
 ?
;
_chemical_name_common             ?
_chemical_melting_point           ?
_chemical_formula_moiety
 'C16 H13 N O2'
_chemical_formula_sum
 'C16 H13 N O2'
_chemical_formula_weight          251.27

loop_
 _atom_type_symbol
 _atom_type_description
 _atom_type_scat_dispersion_real
 _atom_type_scat_dispersion_imag
 _atom_type_scat_source
 'C'  'C'   0.0033   0.0016
 'International Tables Vol C Tables 4.2.6.8 and 6.1.1.4'
 'H'  'H'   0.0000   0.0000
 'International Tables Vol C Tables 4.2.6.8 and 6.1.1.4'
 'N'  'N'   0.0061   0.0033
 'International Tables Vol C Tables 4.2.6.8 and 6.1.1.4'
 'O'  'O'   0.0106   0.0060
 'International Tables Vol C Tables 4.2.6.8 and 6.1.1.4'

_space_group_crystal_system       monoclinic
_space_group_IT_number            14
_space_group_name_H-M_alt         'P 21/c'
_space_group_name_Hall            '-P 2ybc'

_shelx_space_group_comment
;
The symmetry employed for this shelxl refinement is uniquely defined
by the following loop, which should always be used as a source of
symmetry information in preference to the above space-group names.
They are only intended as comments.
;

loop_
 _space_group_symop_operation_xyz
 'x, y, z'
 '-x, y+1/2, -z+1/2'
 '-x, -y, -z'
 'x, -y-1/2, z-1/2'

_cell_length_a                    9.1382(5)
_cell_length_b                    11.9472(6)
_cell_length_c                    11.4848(7)
_cell_angle_alpha                 90
_cell_angle_beta                  97.094(6)
_cell_angle_gamma                 90
_cell_volume                      1244.26(12)
_cell_formula_units_Z             4
_cell_measurement_temperature     173
_cell_measurement_reflns_used     1301
_cell_measurement_theta_min       2.9920
_cell_measurement_theta_max       27.8760

_exptl_crystal_description        blocks
_exptl_crystal_colour             Colourless
_exptl_crystal_density_meas       ?
_exptl_crystal_density_method     ?
_exptl_crystal_density_diffrn     1.341
_exptl_crystal_F_000              528
_exptl_transmission_factor_min    ?
_exptl_transmission_factor_max    ?
_exptl_crystal_size_max           0.66
_exptl_crystal_size_mid           0.50
_exptl_crystal_size_min           0.20
_exptl_absorpt_coefficient_mu     0.089
_shelx_estimated_absorpt_T_min    ?
_shelx_estimated_absorpt_T_max    ?
_exptl_absorpt_correction_type    analytical
_exptl_absorpt_correction_T_min   0.961
_exptl_absorpt_correction_T_max   0.987
_exptl_absorpt_process_details
;
CrysAlisPro, Agilent Technologies,
Version 1.171.37.33a (release 28-03-2014 CrysAlis171 .NET)
(compiled Mar 28 2014,12:25:20)
Analytical numeric absorption correction using a multifaceted crystal
model based on expressions derived by R.C. Clark & J.S. Reid.
(Clark, R. C. & Reid, J. S. (1995). Acta Cryst. A51, 887-897)
Empirical absorption correction using spherical harmonics,
implemented in SCALE3 ABSPACK scaling algorithm.
;

_exptl_special_details
;
 ?
;

_diffrn_ambient_temperature       173
_diffrn_radiation_wavelength      0.71073
_diffrn_radiation_type            MoK\a
_diffrn_source                    'Enhance (Mo) X-ray Source'
_diffrn_measurement_device_type   'Agilent Xcalibur 3 E'
_diffrn_measurement_method        'omega scans'
_diffrn_detector_area_resol_mean  16.0382
_diffrn_reflns_number             4403
_diffrn_reflns_av_unetI/netI      0.0319
_diffrn_reflns_av_R_equivalents   0.0164
_diffrn_reflns_limit_h_min        -10
_diffrn_reflns_limit_h_max        6
_diffrn_reflns_limit_k_min        -9
_diffrn_reflns_limit_k_max        15
_diffrn_reflns_limit_l_min        -15
_diffrn_reflns_limit_l_max        14
_diffrn_reflns_theta_min          2.820
_diffrn_reflns_theta_max          28.286
_diffrn_reflns_theta_full         25.242
_diffrn_measured_fraction_theta_max   0.812
_diffrn_measured_fraction_theta_full  0.990
_diffrn_reflns_Laue_measured_fraction_max    0.812
_diffrn_reflns_Laue_measured_fraction_full   0.990
_diffrn_reflns_point_group_measured_fraction_max   0.812
_diffrn_reflns_point_group_measured_fraction_full  0.990
_reflns_number_total              2504
_reflns_number_gt                 1966
_reflns_threshold_expression      'I > 2\s(I)'
_reflns_Friedel_coverage          0.000
_reflns_Friedel_fraction_max      .
_reflns_Friedel_fraction_full     .

_reflns_special_details
;
 Reflections were merged by SHELXL according to the crystal
 class for the calculation of statistics and refinement.

 _reflns_Friedel_fraction is defined as the number of unique
 Friedel pairs measured divided by the number that would be
 possible theoretically, ignoring centric projections and
 systematic absences.
;

_computing_data_collection        'CrysAlisPro, Agilent Technologies'
_computing_cell_refinement        'CrysAlisPro, Agilent Technologies'
_computing_data_reduction         'CrysAlisPro, Agilent Technologies'
_computing_structure_solution     'SHELXS-2013 (Sheldrick, 2013)'
_computing_structure_refinement   'SHELXL-2013 (Sheldrick, 2013)'
_computing_molecular_graphics     'Bruker SHELXTL'
_computing_publication_material   'CIFTAB-2013 (Sheldrick, 2013)'

_refine_special_details
;
 ?
;
_refine_ls_structure_factor_coef  Fsqd
_refine_ls_matrix_type            full
_refine_ls_weighting_scheme       calc
_refine_ls_weighting_details
'w=1/[\s^2^(Fo^2^)+(0.0382P)^2^+0.2745P] where P=(Fo^2^+2Fc^2^)/3'
_atom_sites_solution_primary      ?
_atom_sites_solution_secondary    ?
_atom_sites_solution_hydrogens    geom
_refine_ls_hydrogen_treatment     constr
_refine_ls_extinction_method      SHELXL
_refine_ls_extinction_coef        0.0087(14)
_refine_ls_extinction_expression
 'Fc^*^=kFc[1+0.001xFc^2^\l^3^/sin(2\q)]^-1/4^'
_refine_ls_number_reflns          2504
_refine_ls_number_parameters      174
_refine_ls_number_restraints      0
_refine_ls_R_factor_all           0.0548
_refine_ls_R_factor_gt            0.0389
_refine_ls_wR_factor_ref          0.0954
_refine_ls_wR_factor_gt           0.0866
_refine_ls_goodness_of_fit_ref    1.039
_refine_ls_restrained_S_all       1.039
_refine_ls_shift/su_max           0.000
_refine_ls_shift/su_mean          0.000

loop_
 _atom_site_label
 _atom_site_type_symbol
 _atom_site_fract_x
 _atom_site_fract_y
 _atom_site_fract_z
 _atom_site_U_iso_or_equiv
 _atom_site_adp_type
 _atom_site_occupancy
 _atom_site_site_symmetry_order
 _atom_site_calc_flag
 _atom_site_refinement_flags_posn
 _atom_site_refinement_flags_adp
 _atom_site_refinement_flags_occupancy
 _atom_site_disorder_assembly
 _atom_site_disorder_group
N1 N 0.47243(13) 0.76468(10) 0.45429(10) 0.0280(3) Uani 1 1 d . . . . .
C2 C 0.51583(15) 0.68805(12) 0.37666(11) 0.0264(3) Uani 1 1 d . . . . .
O2 O 0.61415(12) 0.70110(9) 0.31490(9) 0.0372(3) Uani 1 1 d . . . . .
C3 C 0.41777(14) 0.59181(11) 0.38820(11) 0.0239(3) Uani 1 1 d . . . . .
C4 C 0.40885(15) 0.49264(12) 0.32567(12) 0.0286(3) Uani 1 1 d . . . . .
H4A H 0.4742 0.4776 0.2694 0.034 Uiso 1 1 calc R U . . .
C5 C 0.30217(16) 0.41608(12) 0.34739(13) 0.0319(4) Uani 1 1 d . . . . .
H5A H 0.2939 0.3471 0.3060 0.038 Uiso 1 1 calc R U . . .
C6 C 0.20651(16) 0.43965(12) 0.42989(13) 0.0312(3) Uani 1 1 d . . . . .
H6A H 0.1334 0.3863 0.4432 0.037 Uiso 1 1 calc R U . . .
C7 C 0.21530(15) 0.53877(12) 0.49287(12) 0.0275(3) Uani 1 1 d . . . . .
H7A H 0.1496 0.5536 0.5489 0.033 Uiso 1 1 calc R U . . .
C8 C 0.32295(14) 0.61613(11) 0.47192(11) 0.0229(3) Uani 1 1 d . . . . .
C9 C 0.35743(15) 0.72956(12) 0.51782(11) 0.0243(3) Uani 1 1 d . . . . .
O10 O 0.52468(11) 0.87333(8) 0.46004(9) 0.0321(3) Uani 1 1 d . . . . .
C11 C 0.65812(16) 0.88062(13) 0.54073(14) 0.0357(4) Uani 1 1 d . . . . .
H11A H 0.6386 0.8555 0.6186 0.053 Uiso 1 1 calc R U . . .
H11B H 0.6926 0.9584 0.5454 0.053 Uiso 1 1 calc R U . . .
H11C H 0.7340 0.8329 0.5131 0.053 Uiso 1 1 calc R U . . .
C12 C 0.30236(16) 0.79687(12) 0.59444(12) 0.0272(3) Uani 1 1 d . . . . .
H12A H 0.3407 0.8709 0.5996 0.033 Uiso 1 1 calc R U . . .
C13 C 0.18986(15) 0.77110(12) 0.67189(12) 0.0266(3) Uani 1 1 d . . . . .
C14 C 0.07959(16) 0.84956(14) 0.68474(13) 0.0352(4) Uani 1 1 d . . . . .
H14A H 0.0762 0.9172 0.6411 0.042 Uiso 1 1 calc R U . . .
C15 C -0.02478(17) 0.83024(15) 0.76008(15) 0.0420(4) Uani 1 1 d . . . . .
H15A H -0.1001 0.8838 0.7668 0.050 Uiso 1 1 calc R U . . .
C16 C -0.01940(17) 0.73342(16) 0.82527(14) 0.0428(4) Uani 1 1 d . . . . .
H16A H -0.0912 0.7200 0.8768 0.051 Uiso 1 1 calc R U . . .
C17 C 0.09060(18) 0.65568(14) 0.81564(14) 0.0382(4) Uani 1 1 d . . . . .
H17A H 0.0948 0.5892 0.8613 0.046 Uiso 1 1 calc R U . . .
C18 C 0.19476(16) 0.67429(12) 0.73967(12) 0.0310(4) Uani 1 1 d . . . . .
H18A H 0.2701 0.6205 0.7338 0.037 Uiso 1 1 calc R U . . .

loop_
 _atom_site_aniso_label
 _atom_site_aniso_U_11
 _atom_site_aniso_U_22
 _atom_site_aniso_U_33
 _atom_site_aniso_U_23
 _atom_site_aniso_U_13
 _atom_site_aniso_U_12
N1 0.0306(7) 0.0240(6) 0.0304(6) -0.0015(5) 0.0076(5) -0.0053(5)
C2 0.0265(7) 0.0327(8) 0.0197(7) 0.0037(6) 0.0021(6) 0.0024(6)
O2 0.0375(6) 0.0467(7) 0.0302(6) 0.0026(5) 0.0151(5) -0.0035(5)
C3 0.0229(7) 0.0273(7) 0.0206(7) 0.0025(6) -0.0004(5) 0.0040(6)
C4 0.0287(8) 0.0316(8) 0.0251(7) -0.0019(6) 0.0008(6) 0.0081(6)
C5 0.0355(8) 0.0258(7) 0.0326(8) -0.0057(7) -0.0032(6) 0.0057(6)
C6 0.0284(8) 0.0268(8) 0.0372(8) 0.0004(7) -0.0004(6) -0.0025(6)
C7 0.0241(7) 0.0299(8) 0.0286(7) -0.0012(6) 0.0035(6) 0.0010(6)
C8 0.0216(7) 0.0251(7) 0.0213(7) 0.0020(6) -0.0002(5) 0.0031(5)
C9 0.0223(7) 0.0270(7) 0.0232(7) 0.0022(6) 0.0018(5) 0.0006(6)
O10 0.0361(6) 0.0253(5) 0.0348(6) 0.0051(5) 0.0032(5) -0.0059(4)
C11 0.0323(8) 0.0360(9) 0.0385(9) -0.0010(7) 0.0037(7) -0.0087(7)
C12 0.0281(8) 0.0255(7) 0.0277(7) -0.0023(6) 0.0023(6) -0.0003(6)
C13 0.0243(7) 0.0300(8) 0.0250(7) -0.0082(6) 0.0015(6) -0.0014(6)
C14 0.0334(8) 0.0382(9) 0.0336(8) -0.0056(7) 0.0030(6) 0.0064(7)
C15 0.0278(8) 0.0560(11) 0.0425(9) -0.0145(9) 0.0062(7) 0.0064(8)
C16 0.0308(9) 0.0633(12) 0.0363(9) -0.0148(9) 0.0120(7) -0.0130(8)
C17 0.0405(9) 0.0436(10) 0.0312(8) -0.0051(7) 0.0078(7) -0.0123(8)
C18 0.0301(8) 0.0335(8) 0.0294(8) -0.0059(7) 0.0039(6) -0.0008(6)

_geom_special_details
;
 All esds (except the esd in the dihedral angle between two l.s. planes)
 are estimated using the full covariance matrix.  The cell esds are taken
 into account individually in the estimation of esds in distances, angles
 and torsion angles; correlations between esds in cell parameters are only
 used when they are defined by crystal symmetry.  An approximate (isotropic)
 treatment of cell esds is used for estimating esds involving l.s. planes.
;

loop_
 _geom_bond_atom_site_label_1
 _geom_bond_atom_site_label_2
 _geom_bond_distance
 _geom_bond_site_symmetry_2
 _geom_bond_publ_flag
N1 C2 1.3703(18) . ?
N1 O10 1.3819(15) . ?
N1 C9 1.4150(17) . ?
C2 O2 1.2215(16) . ?
C2 C3 1.474(2) . ?
C3 C4 1.3825(19) . ?
C3 C8 1.4020(18) . ?
C4 C5 1.382(2) . ?
C5 C6 1.395(2) . ?
C6 C7 1.385(2) . ?
C7 C8 1.3923(19) . ?
C8 C9 1.4739(19) . ?
C9 C12 1.3355(19) . ?
O10 C11 1.4402(17) . ?
C12 C13 1.4727(19) . ?
C13 C18 1.392(2) . ?
C13 C14 1.397(2) . ?
C14 C15 1.384(2) . ?
C15 C16 1.375(2) . ?
C16 C17 1.383(2) . ?
C17 C18 1.386(2) . ?

loop_
 _geom_angle_atom_site_label_1
 _geom_angle_atom_site_label_2
 _geom_angle_atom_site_label_3
 _geom_angle
 _geom_angle_site_symmetry_1
 _geom_angle_site_symmetry_3
 _geom_angle_publ_flag
C2 N1 O10 122.19(11) . . ?
C2 N1 C9 115.49(11) . . ?
O10 N1 C9 121.88(11) . . ?
O2 C2 N1 125.82(14) . . ?
O2 C2 C3 130.60(13) . . ?
N1 C2 C3 103.58(11) . . ?
C4 C3 C8 122.15(13) . . ?
C4 C3 C2 128.27(13) . . ?
C8 C3 C2 109.52(12) . . ?
C5 C4 C3 118.11(13) . . ?
C4 C5 C6 120.29(13) . . ?
C7 C6 C5 121.78(14) . . ?
C6 C7 C8 118.30(13) . . ?
C7 C8 C3 119.38(13) . . ?
C7 C8 C9 132.29(13) . . ?
C3 C8 C9 108.24(12) . . ?
C12 C9 N1 121.70(13) . . ?
C12 C9 C8 135.07(13) . . ?
N1 C9 C8 103.17(11) . . ?
N1 O10 C11 110.34(10) . . ?
C9 C12 C13 128.32(13) . . ?
C18 C13 C14 118.18(14) . . ?
C18 C13 C12 122.33(13) . . ?
C14 C13 C12 119.33(14) . . ?
C15 C14 C13 121.05(16) . . ?
C16 C15 C14 119.97(15) . . ?
C15 C16 C17 119.92(15) . . ?
C16 C17 C18 120.32(16) . . ?
C17 C18 C13 120.54(15) . . ?

_refine_diff_density_max    0.241
_refine_diff_density_min   -0.147
_refine_diff_density_rms    0.038

_shelxl_version_number 2013-4

#===END


data_4aa

_audit_creation_method            SHELXL
_chemical_name_systematic
;
 ?
;
_chemical_name_common             ?
_chemical_melting_point           ?
_chemical_formula_moiety
 'C16 H15 N O2'
_chemical_formula_sum
 'C16 H15 N O2'
_chemical_formula_weight          253.29

loop_
 _atom_type_symbol
 _atom_type_description
 _atom_type_scat_dispersion_real
 _atom_type_scat_dispersion_imag
 _atom_type_scat_source
 'C'  'C'   0.0033   0.0016
 'International Tables Vol C Tables 4.2.6.8 and 6.1.1.4'
 'H'  'H'   0.0000   0.0000
 'International Tables Vol C Tables 4.2.6.8 and 6.1.1.4'
 'N'  'N'   0.0061   0.0033
 'International Tables Vol C Tables 4.2.6.8 and 6.1.1.4'
 'O'  'O'   0.0106   0.0060
 'International Tables Vol C Tables 4.2.6.8 and 6.1.1.4'

_space_group_crystal_system       orthorhombic
_space_group_IT_number            19
_space_group_name_H-M_alt         'P 21 21 21'
_space_group_name_Hall            'P 2ac 2ab'

_shelx_space_group_comment
;
The symmetry employed for this shelxl refinement is uniquely defined
by the following loop, which should always be used as a source of
symmetry information in preference to the above space-group names.
They are only intended as comments.
;

loop_
 _space_group_symop_operation_xyz
 'x, y, z'
 '-x+1/2, -y, z+1/2'
 '-x, y+1/2, -z+1/2'
 'x+1/2, -y+1/2, -z'

_cell_length_a                    8.5662(4)
_cell_length_b                    10.7642(6)
_cell_length_c                    14.3417(7)
_cell_angle_alpha                 90
_cell_angle_beta                  90
_cell_angle_gamma                 90
_cell_volume                      1322.42(11)
_cell_formula_units_Z             4
_cell_measurement_temperature     173
_cell_measurement_reflns_used     1203
_cell_measurement_theta_min       3.4130
_cell_measurement_theta_max       26.2020

_exptl_crystal_description        'blocky needles'
_exptl_crystal_colour             Colourless
_exptl_crystal_density_meas       ?
_exptl_crystal_density_method     ?
_exptl_crystal_density_diffrn     1.272
_exptl_crystal_F_000              536
_exptl_transmission_factor_min    ?
_exptl_transmission_factor_max    ?
_exptl_crystal_size_max           0.69
_exptl_crystal_size_mid           0.37
_exptl_crystal_size_min           0.25
_exptl_absorpt_coefficient_mu     0.084
_shelx_estimated_absorpt_T_min    ?
_shelx_estimated_absorpt_T_max    ?
_exptl_absorpt_correction_type    analytical
_exptl_absorpt_correction_T_min   0.959
_exptl_absorpt_correction_T_max   0.983
_exptl_absorpt_process_details
;
CrysAlisPro, Agilent Technologies,
Version 1.171.37.33a (release 28-03-2014 CrysAlis171 .NET)
(compiled Mar 28 2014,12:25:20)
Analytical numeric absorption correction using a multifaceted crystal
model based on expressions derived by R.C. Clark & J.S. Reid.
(Clark, R. C. & Reid, J. S. (1995). Acta Cryst. A51, 887-897)
Empirical absorption correction using spherical harmonics,
implemented in SCALE3 ABSPACK scaling algorithm.
;

_exptl_special_details
;
 ?
;

_diffrn_ambient_temperature       173
_diffrn_radiation_wavelength      0.71073
_diffrn_radiation_type            MoK\a
_diffrn_source                    'Enhance (Mo) X-ray Source'
_diffrn_measurement_device_type   'Agilent Xcalibur 3 E'
_diffrn_measurement_method        'omega scans'
_diffrn_detector_area_resol_mean  16.0382
_diffrn_reflns_number             3345
_diffrn_reflns_av_unetI/netI      0.0408
_diffrn_reflns_av_R_equivalents   0.0184
_diffrn_reflns_limit_h_min        -11
_diffrn_reflns_limit_h_max        7
_diffrn_reflns_limit_k_min        -13
_diffrn_reflns_limit_k_max        9
_diffrn_reflns_limit_l_min        -18
_diffrn_reflns_limit_l_max        16
_diffrn_reflns_theta_min          2.770
_diffrn_reflns_theta_max          28.139
_diffrn_reflns_theta_full         25.242
_diffrn_measured_fraction_theta_max   0.826
_diffrn_measured_fraction_theta_full  0.983
_diffrn_reflns_Laue_measured_fraction_max    0.826
_diffrn_reflns_Laue_measured_fraction_full   0.983
_diffrn_reflns_point_group_measured_fraction_max   0.734
_diffrn_reflns_point_group_measured_fraction_full  0.912
_reflns_number_total              2378
_reflns_number_gt                 2131
_reflns_threshold_expression      'I > 2\s(I)'
_reflns_Friedel_coverage          0.544
_reflns_Friedel_fraction_max      0.609
_reflns_Friedel_fraction_full     0.812

_reflns_special_details
;
 Reflections were merged by SHELXL according to the crystal
 class for the calculation of statistics and refinement.

 _reflns_Friedel_fraction is defined as the number of unique
 Friedel pairs measured divided by the number that would be
 possible theoretically, ignoring centric projections and
 systematic absences.
;

_computing_data_collection        'CrysAlisPro, Agilent Technologies'
_computing_cell_refinement        'CrysAlisPro, Agilent Technologies'
_computing_data_reduction         'CrysAlisPro, Agilent Technologies'
_computing_structure_solution     'SHELXS-2013 (Sheldrick, 2013)'
_computing_structure_refinement   'SHELXL-2013 (Sheldrick, 2013)'
_computing_molecular_graphics     'Bruker SHELXTL'
_computing_publication_material   'CIFTAB-2013 (Sheldrick, 2013)'

_refine_special_details
;
 ?
;
_refine_ls_structure_factor_coef  Fsqd
_refine_ls_matrix_type            full
_refine_ls_weighting_scheme       calc
_refine_ls_weighting_details
'w=1/[\s^2^(Fo^2^)+(0.0300P)^2^+0.0806P] where P=(Fo^2^+2Fc^2^)/3'
_atom_sites_solution_primary      ?
_atom_sites_solution_secondary    ?
_atom_sites_solution_hydrogens    geom
_refine_ls_hydrogen_treatment     constr
_refine_ls_extinction_method      SHELXL
_refine_ls_extinction_coef        0.014(2)
_refine_ls_extinction_expression
 'Fc^*^=kFc[1+0.001xFc^2^\l^3^/sin(2\q)]^-1/4^'
_refine_ls_abs_structure_details
;
 Flack x determined using 702 quotients [(I+)-(I-)]/[(I+)+(I-)]
 (Parsons and Flack (2004), Acta Cryst. A60, s61).
;
_refine_ls_abs_structure_Flack    -0.6(8)
_chemical_absolute_configuration  unk
_refine_ls_number_reflns          2378
_refine_ls_number_parameters      174
_refine_ls_number_restraints      0
_refine_ls_R_factor_all           0.0445
_refine_ls_R_factor_gt            0.0368
_refine_ls_wR_factor_ref          0.0785
_refine_ls_wR_factor_gt           0.0735
_refine_ls_goodness_of_fit_ref    1.084
_refine_ls_restrained_S_all       1.084
_refine_ls_shift/su_max           0.000
_refine_ls_shift/su_mean          0.000

loop_
 _atom_site_label
 _atom_site_type_symbol
 _atom_site_fract_x
 _atom_site_fract_y
 _atom_site_fract_z
 _atom_site_U_iso_or_equiv
 _atom_site_adp_type
 _atom_site_occupancy
 _atom_site_site_symmetry_order
 _atom_site_calc_flag
 _atom_site_refinement_flags_posn
 _atom_site_refinement_flags_adp
 _atom_site_refinement_flags_occupancy
 _atom_site_disorder_assembly
 _atom_site_disorder_group
N1 N 0.9943(2) 0.79241(17) 0.34073(11) 0.0315(4) Uani 1 1 d . . . . .
C2 C 1.1075(3) 0.8783(2) 0.32827(15) 0.0297(5) Uani 1 1 d . . . . .
O2 O 1.1708(2) 0.94131(17) 0.38784(11) 0.0488(5) Uani 1 1 d . . . . .
C3 C 1.1348(2) 0.87650(19) 0.22590(13) 0.0250(5) Uani 1 1 d . . . . .
C4 C 1.2457(3) 0.9404(2) 0.17519(15) 0.0330(5) Uani 1 1 d . . . . .
H4A H 1.3196 0.9927 0.2051 0.040 Uiso 1 1 calc R U . . .
C5 C 1.2456(3) 0.9258(2) 0.07937(15) 0.0393(6) Uani 1 1 d . . . . .
H5A H 1.3193 0.9696 0.0423 0.047 Uiso 1 1 calc R U . . .
C6 C 1.1386(3) 0.8478(2) 0.03749(15) 0.0416(7) Uani 1 1 d . . . . .
H6A H 1.1385 0.8408 -0.0285 0.050 Uiso 1 1 calc R U . . .
C7 C 1.0313(3) 0.7793(2) 0.08855(14) 0.0375(6) Uani 1 1 d . . . . .
H7A H 0.9610 0.7237 0.0589 0.045 Uiso 1 1 calc R U . . .
C8 C 1.0307(2) 0.79525(19) 0.18445(14) 0.0268(5) Uani 1 1 d . . . . .
C9 C 0.9305(2) 0.7342(2) 0.25733(13) 0.0293(5) Uani 1 1 d . . . . .
H9A H 0.9522 0.6429 0.2587 0.035 Uiso 1 1 calc R U . . .
O10 O 0.92384(19) 0.77191(16) 0.42637(9) 0.0396(5) Uani 1 1 d . . . . .
C11 C 1.0110(3) 0.6814(2) 0.47875(16) 0.0447(7) Uani 1 1 d . . . . .
H11A H 0.9518 0.6577 0.5344 0.067 Uiso 1 1 calc R U . . .
H11B H 1.1114 0.7172 0.4975 0.067 Uiso 1 1 calc R U . . .
H11C H 1.0292 0.6079 0.4400 0.067 Uiso 1 1 calc R U . . .
C12 C 0.7542(2) 0.7562(2) 0.24744(15) 0.0329(5) Uani 1 1 d . . . . .
H12A H 0.7155 0.7070 0.1939 0.040 Uiso 1 1 calc R U . . .
H12B H 0.7016 0.7246 0.3041 0.040 Uiso 1 1 calc R U . . .
C13 C 0.7080(2) 0.8897(2) 0.23340(15) 0.0307(5) Uani 1 1 d . . . . .
C14 C 0.6974(3) 0.9713(2) 0.30819(17) 0.0377(6) Uani 1 1 d . . . . .
H14A H 0.7183 0.9421 0.3694 0.045 Uiso 1 1 calc R U . . .
C15 C 0.6568(3) 1.0945(2) 0.29491(18) 0.0437(6) Uani 1 1 d . . . . .
H15A H 0.6502 1.1492 0.3467 0.052 Uiso 1 1 calc R U . . .
C16 C 0.6257(3) 1.1378(2) 0.20602(18) 0.0433(7) Uani 1 1 d . . . . .
H16A H 0.5974 1.2223 0.1968 0.052 Uiso 1 1 calc R U . . .
C17 C 0.6357(3) 1.0589(2) 0.13113(17) 0.0438(6) Uani 1 1 d . . . . .
H17A H 0.6146 1.0884 0.0700 0.053 Uiso 1 1 calc R U . . .
C18 C 0.6767(3) 0.9360(2) 0.14519(16) 0.0378(6) Uani 1 1 d . . . . .
H18A H 0.6836 0.8819 0.0930 0.045 Uiso 1 1 calc R U . . .

loop_
 _atom_site_aniso_label
 _atom_site_aniso_U_11
 _atom_site_aniso_U_22
 _atom_site_aniso_U_33
 _atom_site_aniso_U_23
 _atom_site_aniso_U_13
 _atom_site_aniso_U_12
N1 0.0314(10) 0.0418(11) 0.0213(8) 0.0026(8) 0.0053(8) -0.0030(9)
C2 0.0309(12) 0.0305(12) 0.0276(11) -0.0022(10) -0.0002(10) 0.0045(10)
O2 0.0546(12) 0.0576(12) 0.0343(9) -0.0171(9) -0.0059(8) -0.0093(10)
C3 0.0274(11) 0.0225(11) 0.0251(10) -0.0014(9) 0.0026(10) 0.0034(10)
C4 0.0340(12) 0.0249(11) 0.0402(12) 0.0001(11) 0.0059(11) 0.0011(10)
C5 0.0400(14) 0.0400(15) 0.0378(13) 0.0078(12) 0.0135(12) 0.0040(13)
C6 0.0479(15) 0.0544(17) 0.0226(11) 0.0012(12) 0.0063(11) 0.0147(14)
C7 0.0366(14) 0.0450(14) 0.0309(11) -0.0102(11) -0.0018(11) 0.0025(12)
C8 0.0258(11) 0.0277(11) 0.0270(10) -0.0030(9) 0.0002(10) 0.0027(9)
C9 0.0298(12) 0.0272(12) 0.0309(11) -0.0016(10) 0.0014(10) -0.0019(10)
O10 0.0393(9) 0.0538(11) 0.0258(7) 0.0125(8) 0.0102(7) 0.0115(9)
C11 0.0472(15) 0.0507(16) 0.0363(13) 0.0141(12) 0.0017(12) 0.0087(14)
C12 0.0269(12) 0.0313(12) 0.0406(12) -0.0007(11) 0.0012(11) -0.0058(10)
C13 0.0206(11) 0.0321(13) 0.0394(12) 0.0005(11) 0.0040(10) -0.0039(10)
C14 0.0318(13) 0.0390(13) 0.0423(13) 0.0013(11) 0.0044(11) -0.0011(11)
C15 0.0334(13) 0.0388(14) 0.0588(16) -0.0097(13) 0.0047(13) -0.0016(12)
C16 0.0246(12) 0.0336(13) 0.0718(19) 0.0084(14) -0.0001(13) -0.0009(11)
C17 0.0328(13) 0.0489(16) 0.0495(15) 0.0139(14) -0.0005(12) -0.0033(13)
C18 0.0313(13) 0.0417(14) 0.0404(13) 0.0003(12) 0.0011(11) -0.0011(11)

_geom_special_details
;
 All esds (except the esd in the dihedral angle between two l.s. planes)
 are estimated using the full covariance matrix.  The cell esds are taken
 into account individually in the estimation of esds in distances, angles
 and torsion angles; correlations between esds in cell parameters are only
 used when they are defined by crystal symmetry.  An approximate (isotropic)
 treatment of cell esds is used for estimating esds involving l.s. planes.
;

loop_
 _geom_bond_atom_site_label_1
 _geom_bond_atom_site_label_2
 _geom_bond_distance
 _geom_bond_site_symmetry_2
 _geom_bond_publ_flag
N1 C2 1.352(3) . ?
N1 O10 1.386(2) . ?
N1 C9 1.457(3) . ?
C2 O2 1.218(2) . ?
C2 C3 1.487(3) . ?
C3 C4 1.380(3) . ?
C3 C8 1.383(3) . ?
C4 C5 1.383(3) . ?
C5 C6 1.380(3) . ?
C6 C7 1.387(3) . ?
C7 C8 1.386(3) . ?
C8 C9 1.504(3) . ?
C9 C12 1.535(3) . ?
O10 C11 1.439(3) . ?
C12 C13 1.505(3) . ?
C13 C18 1.386(3) . ?
C13 C14 1.389(3) . ?
C14 C15 1.384(3) . ?
C15 C16 1.383(3) . ?
C16 C17 1.372(3) . ?
C17 C18 1.383(3) . ?

loop_
 _geom_angle_atom_site_label_1
 _geom_angle_atom_site_label_2
 _geom_angle_atom_site_label_3
 _geom_angle
 _geom_angle_site_symmetry_1
 _geom_angle_site_symmetry_3
 _geom_angle_publ_flag
C2 N1 O10 122.57(17) . . ?
C2 N1 C9 117.07(17) . . ?
O10 N1 C9 119.71(17) . . ?
O2 C2 N1 127.4(2) . . ?
O2 C2 C3 129.0(2) . . ?
N1 C2 C3 103.56(18) . . ?
C4 C3 C8 122.16(19) . . ?
C4 C3 C2 128.5(2) . . ?
C8 C3 C2 109.35(18) . . ?
C3 C4 C5 117.8(2) . . ?
C6 C5 C4 120.1(2) . . ?
C5 C6 C7 122.24(19) . . ?
C8 C7 C6 117.4(2) . . ?
C3 C8 C7 120.2(2) . . ?
C3 C8 C9 110.22(17) . . ?
C7 C8 C9 129.6(2) . . ?
N1 C9 C8 99.68(17) . . ?
N1 C9 C12 112.25(18) . . ?
C8 C9 C12 115.47(18) . . ?
N1 O10 C11 110.15(17) . . ?
C13 C12 C9 114.73(18) . . ?
C18 C13 C14 117.7(2) . . ?
C18 C13 C12 121.1(2) . . ?
C14 C13 C12 121.2(2) . . ?
C15 C14 C13 121.1(2) . . ?
C16 C15 C14 119.9(2) . . ?
C17 C16 C15 120.1(2) . . ?
C16 C17 C18 119.6(2) . . ?
C17 C18 C13 121.7(2) . . ?

_refine_diff_density_max    0.154
_refine_diff_density_min   -0.128
_refine_diff_density_rms    0.032

_shelxl_version_number 2013-4

#===END


data_4aa_prime

_audit_creation_method            SHELXL
_chemical_name_systematic
;
 ?
;
_chemical_name_common             ?
_chemical_melting_point           ?
_chemical_formula_moiety
 'C15 H13 N O'
_chemical_formula_sum
 'C15 H13 N O'
_chemical_formula_weight          223.26

loop_
 _atom_type_symbol
 _atom_type_description
 _atom_type_scat_dispersion_real
 _atom_type_scat_dispersion_imag
 _atom_type_scat_source
 'C'  'C'   0.0033   0.0016
 'International Tables Vol C Tables 4.2.6.8 and 6.1.1.4'
 'H'  'H'   0.0000   0.0000
 'International Tables Vol C Tables 4.2.6.8 and 6.1.1.4'
 'N'  'N'   0.0061   0.0033
 'International Tables Vol C Tables 4.2.6.8 and 6.1.1.4'
 'O'  'O'   0.0106   0.0060
 'International Tables Vol C Tables 4.2.6.8 and 6.1.1.4'

_space_group_crystal_system       monoclinic
_space_group_IT_number            14
_space_group_name_H-M_alt         'P 21/c'
_space_group_name_Hall            '-P 2ybc'

_shelx_space_group_comment
;
The symmetry employed for this shelxl refinement is uniquely defined
by the following loop, which should always be used as a source of
symmetry information in preference to the above space-group names.
They are only intended as comments.
;

loop_
 _space_group_symop_operation_xyz
 'x, y, z'
 '-x, y+1/2, -z+1/2'
 '-x, -y, -z'
 'x, -y-1/2, z-1/2'

_cell_length_a                    12.6365(8)
_cell_length_b                    8.5132(4)
_cell_length_c                    12.1579(8)
_cell_angle_alpha                 90
_cell_angle_beta                  116.664(8)
_cell_angle_gamma                 90
_cell_volume                      1168.82(15)
_cell_formula_units_Z             4
_cell_measurement_temperature     173
_cell_measurement_reflns_used     1278
_cell_measurement_theta_min       3.0450
_cell_measurement_theta_max       27.1750

_exptl_crystal_description        tablets
_exptl_crystal_colour             Colourless
_exptl_crystal_density_meas       ?
_exptl_crystal_density_method     ?
_exptl_crystal_density_diffrn     1.269
_exptl_crystal_F_000              472
_exptl_transmission_factor_min    ?
_exptl_transmission_factor_max    ?
_exptl_crystal_size_max           0.69
_exptl_crystal_size_mid           0.51
_exptl_crystal_size_min           0.15
_exptl_absorpt_coefficient_mu     0.080
_shelx_estimated_absorpt_T_min    ?
_shelx_estimated_absorpt_T_max    ?
_exptl_absorpt_correction_type    analytical
_exptl_absorpt_correction_T_min   0.963
_exptl_absorpt_correction_T_max   0.989
_exptl_absorpt_process_details
;
CrysAlisPro, Agilent Technologies,
Version 1.171.37.35 (release 13-08-2014 CrysAlis171 .NET)
(compiled Aug 13 2014,18:06:01)
Analytical numeric absorption correction using a multifaceted crystal
model based on expressions derived by R.C. Clark & J.S. Reid.
(Clark, R. C. & Reid, J. S. (1995). Acta Cryst. A51, 887-897)
Empirical absorption correction using spherical harmonics,
implemented in SCALE3 ABSPACK scaling algorithm.
;

_exptl_special_details
;
 ?
;

_diffrn_ambient_temperature       173
_diffrn_radiation_wavelength      0.71073
_diffrn_radiation_type            MoK\a
_diffrn_source                    'Enhance (Mo) X-ray Source'
_diffrn_measurement_device_type   'Agilent Xcalibur 3 E'
_diffrn_measurement_method        'omega scans'
_diffrn_detector_area_resol_mean  16.0382
_diffrn_reflns_number             4118
_diffrn_reflns_av_unetI/netI      0.0379
_diffrn_reflns_av_R_equivalents   0.0190
_diffrn_reflns_limit_h_min        -16
_diffrn_reflns_limit_h_max        15
_diffrn_reflns_limit_k_min        -11
_diffrn_reflns_limit_k_max        10
_diffrn_reflns_limit_l_min        -15
_diffrn_reflns_limit_l_max        14
_diffrn_reflns_theta_min          2.997
_diffrn_reflns_theta_max          28.264
_diffrn_reflns_theta_full         25.242
_diffrn_measured_fraction_theta_max   0.801
_diffrn_measured_fraction_theta_full  0.983
_diffrn_reflns_Laue_measured_fraction_max    0.801
_diffrn_reflns_Laue_measured_fraction_full   0.983
_diffrn_reflns_point_group_measured_fraction_max   0.801
_diffrn_reflns_point_group_measured_fraction_full  0.983
_reflns_number_total              2324
_reflns_number_gt                 1804
_reflns_threshold_expression      'I > 2\s(I)'
_reflns_Friedel_coverage          0.000
_reflns_Friedel_fraction_max      .
_reflns_Friedel_fraction_full     .

_reflns_special_details
;
 Reflections were merged by SHELXL according to the crystal
 class for the calculation of statistics and refinement.

 _reflns_Friedel_fraction is defined as the number of unique
 Friedel pairs measured divided by the number that would be
 possible theoretically, ignoring centric projections and
 systematic absences.
;

_computing_data_collection        'CrysAlisPro, Agilent Technologies'
_computing_cell_refinement        'CrysAlisPro, Agilent Technologies'
_computing_data_reduction         'CrysAlisPro, Agilent Technologies'
_computing_structure_solution     'SHELXS-2013 (Sheldrick, 2013)'
_computing_structure_refinement   'SHELXL-2013 (Sheldrick, 2013)'
_computing_molecular_graphics     'Bruker SHELXTL'
_computing_publication_material   'CIFTAB-2013 (Sheldrick, 2013)'

_refine_special_details
;
 ?
;
_refine_ls_structure_factor_coef  Fsqd
_refine_ls_matrix_type            full
_refine_ls_weighting_scheme       calc
_refine_ls_weighting_details
'w=1/[\s^2^(Fo^2^)+(0.0436P)^2^+0.2695P] where P=(Fo^2^+2Fc^2^)/3'
_atom_sites_solution_primary      ?
_atom_sites_solution_secondary    ?
_atom_sites_solution_hydrogens    mixed
_refine_ls_hydrogen_treatment     mixed
_refine_ls_extinction_method      none
_refine_ls_extinction_coef        .
_refine_ls_number_reflns          2324
_refine_ls_number_parameters      158
_refine_ls_number_restraints      1
_refine_ls_R_factor_all           0.0644
_refine_ls_R_factor_gt            0.0462
_refine_ls_wR_factor_ref          0.1110
_refine_ls_wR_factor_gt           0.0987
_refine_ls_goodness_of_fit_ref    1.063
_refine_ls_restrained_S_all       1.062
_refine_ls_shift/su_max           0.000
_refine_ls_shift/su_mean          0.000

loop_
 _atom_site_label
 _atom_site_type_symbol
 _atom_site_fract_x
 _atom_site_fract_y
 _atom_site_fract_z
 _atom_site_U_iso_or_equiv
 _atom_site_adp_type
 _atom_site_occupancy
 _atom_site_site_symmetry_order
 _atom_site_calc_flag
 _atom_site_refinement_flags_posn
 _atom_site_refinement_flags_adp
 _atom_site_refinement_flags_occupancy
 _atom_site_disorder_assembly
 _atom_site_disorder_group
N1 N 0.44219(11) 0.33034(16) 0.39681(12) 0.0279(3) Uani 1 1 d D . . . .
H1 H 0.5108(8) 0.3840(18) 0.4293(14) 0.042(5) Uiso 1 1 d D . . . .
C2 C 0.35284(14) 0.36893(19) 0.42375(14) 0.0285(4) Uani 1 1 d . . . . .
O2 O 0.35835(10) 0.46130(14) 0.50431(11) 0.0381(3) Uani 1 1 d . . . . .
C3 C 0.24839(13) 0.27870(19) 0.33832(14) 0.0273(4) Uani 1 1 d . . . . .
C4 C 0.13615(14) 0.2694(2) 0.33133(16) 0.0359(4) Uani 1 1 d . . . . .
H4A H 0.1158 0.3274 0.3859 0.043 Uiso 1 1 calc R U . . .
C5 C 0.05499(15) 0.1729(2) 0.24234(16) 0.0431(5) Uani 1 1 d . . . . .
H5A H -0.0228 0.1642 0.2351 0.052 Uiso 1 1 calc R U . . .
C6 C 0.08553(15) 0.0886(2) 0.16345(16) 0.0429(5) Uani 1 1 d . . . . .
H6A H 0.0281 0.0225 0.1033 0.051 Uiso 1 1 calc R U . . .
C7 C 0.19768(15) 0.0981(2) 0.16990(15) 0.0346(4) Uani 1 1 d . . . . .
H7A H 0.2179 0.0401 0.1153 0.042 Uiso 1 1 calc R U . . .
C8 C 0.27890(13) 0.19514(18) 0.25895(13) 0.0260(4) Uani 1 1 d . . . . .
C9 C 0.40651(13) 0.22700(18) 0.29008(14) 0.0253(3) Uani 1 1 d . . . . .
H9A H 0.4108 0.2857 0.2209 0.030 Uiso 1 1 calc R U . . .
C10 C 0.48186(14) 0.07820(18) 0.31746(15) 0.0288(4) Uani 1 1 d . . . . .
H10A H 0.4788 0.0226 0.3875 0.035 Uiso 1 1 calc R U . . .
H10B H 0.4471 0.0080 0.2450 0.035 Uiso 1 1 calc R U . . .
C11 C 0.60935(14) 0.10908(18) 0.34795(14) 0.0273(4) Uani 1 1 d . . . . .
C12 C 0.63999(14) 0.16307(19) 0.25820(15) 0.0309(4) Uani 1 1 d . . . . .
H12A H 0.5795 0.1835 0.1776 0.037 Uiso 1 1 calc R U . . .
C13 C 0.75732(15) 0.1876(2) 0.28426(17) 0.0394(4) Uani 1 1 d . . . . .
H13A H 0.7768 0.2244 0.2218 0.047 Uiso 1 1 calc R U . . .
C14 C 0.84564(16) 0.1585(2) 0.40097(18) 0.0457(5) Uani 1 1 d . . . . .
H14A H 0.9262 0.1746 0.4191 0.055 Uiso 1 1 calc R U . . .
C15 C 0.81686(17) 0.1063(2) 0.49089(18) 0.0489(5) Uani 1 1 d . . . . .
H15A H 0.8777 0.0869 0.5715 0.059 Uiso 1 1 calc R U . . .
C16 C 0.69987(16) 0.0816(2) 0.46473(16) 0.0393(4) Uani 1 1 d . . . . .
H16A H 0.6812 0.0453 0.5278 0.047 Uiso 1 1 calc R U . . .

loop_
 _atom_site_aniso_label
 _atom_site_aniso_U_11
 _atom_site_aniso_U_22
 _atom_site_aniso_U_33
 _atom_site_aniso_U_23
 _atom_site_aniso_U_13
 _atom_site_aniso_U_12
N1 0.0251(7) 0.0276(7) 0.0340(7) -0.0071(6) 0.0158(6) -0.0045(6)
C2 0.0306(9) 0.0270(8) 0.0311(8) -0.0012(7) 0.0168(7) -0.0006(7)
O2 0.0395(7) 0.0402(7) 0.0438(7) -0.0160(6) 0.0269(6) -0.0088(6)
C3 0.0282(8) 0.0275(8) 0.0287(8) 0.0023(7) 0.0150(7) 0.0012(7)
C4 0.0293(9) 0.0449(10) 0.0387(9) -0.0026(8) 0.0199(8) 0.0021(8)
C5 0.0239(9) 0.0654(13) 0.0404(10) -0.0033(10) 0.0147(8) -0.0059(9)
C6 0.0312(9) 0.0617(13) 0.0334(9) -0.0101(9) 0.0123(8) -0.0145(9)
C7 0.0346(9) 0.0416(10) 0.0298(9) -0.0063(8) 0.0164(8) -0.0069(8)
C8 0.0261(8) 0.0271(8) 0.0262(8) 0.0024(7) 0.0130(7) -0.0006(7)
C9 0.0271(8) 0.0255(8) 0.0262(8) -0.0015(7) 0.0146(7) -0.0023(7)
C10 0.0321(9) 0.0242(8) 0.0350(9) -0.0007(7) 0.0195(7) -0.0001(7)
C11 0.0294(9) 0.0216(8) 0.0355(9) -0.0022(7) 0.0185(7) 0.0019(7)
C12 0.0303(9) 0.0307(9) 0.0336(9) -0.0012(7) 0.0159(7) 0.0022(7)
C13 0.0351(10) 0.0441(11) 0.0464(10) 0.0008(9) 0.0250(9) -0.0012(8)
C14 0.0281(9) 0.0530(12) 0.0556(12) -0.0005(10) 0.0185(9) -0.0021(9)
C15 0.0340(10) 0.0597(13) 0.0412(10) 0.0069(10) 0.0064(8) 0.0018(10)
C16 0.0388(10) 0.0444(11) 0.0354(9) 0.0059(8) 0.0173(8) 0.0011(9)

_geom_special_details
;
 All esds (except the esd in the dihedral angle between two l.s. planes)
 are estimated using the full covariance matrix.  The cell esds are taken
 into account individually in the estimation of esds in distances, angles
 and torsion angles; correlations between esds in cell parameters are only
 used when they are defined by crystal symmetry.  An approximate (isotropic)
 treatment of cell esds is used for estimating esds involving l.s. planes.
;

loop_
 _geom_bond_atom_site_label_1
 _geom_bond_atom_site_label_2
 _geom_bond_distance
 _geom_bond_site_symmetry_2
 _geom_bond_publ_flag
N1 C2 1.3497(19) . ?
N1 C9 1.4615(19) . ?
C2 O2 1.2335(18) . ?
C2 C3 1.477(2) . ?
C3 C4 1.385(2) . ?
C3 C8 1.386(2) . ?
C4 C5 1.379(2) . ?
C5 C6 1.384(3) . ?
C6 C7 1.386(2) . ?
C7 C8 1.382(2) . ?
C8 C9 1.506(2) . ?
C9 C10 1.529(2) . ?
C10 C11 1.505(2) . ?
C11 C16 1.386(2) . ?
C11 C12 1.390(2) . ?
C12 C13 1.386(2) . ?
C13 C14 1.378(3) . ?
C14 C15 1.372(3) . ?
C15 C16 1.382(3) . ?

loop_
 _geom_angle_atom_site_label_1
 _geom_angle_atom_site_label_2
 _geom_angle_atom_site_label_3
 _geom_angle
 _geom_angle_site_symmetry_1
 _geom_angle_site_symmetry_3
 _geom_angle_publ_flag
C2 N1 C9 113.80(13) . . ?
O2 C2 N1 126.34(15) . . ?
O2 C2 C3 127.18(14) . . ?
N1 C2 C3 106.48(13) . . ?
C4 C3 C8 121.70(15) . . ?
C4 C3 C2 129.83(15) . . ?
C8 C3 C2 108.47(13) . . ?
C5 C4 C3 117.58(15) . . ?
C4 C5 C6 120.80(15) . . ?
C5 C6 C7 121.77(16) . . ?
C8 C7 C6 117.39(15) . . ?
C7 C8 C3 120.76(14) . . ?
C7 C8 C9 129.73(14) . . ?
C3 C8 C9 109.49(13) . . ?
N1 C9 C8 101.56(11) . . ?
N1 C9 C10 113.05(13) . . ?
C8 C9 C10 113.41(13) . . ?
C11 C10 C9 113.70(13) . . ?
C16 C11 C12 117.87(15) . . ?
C16 C11 C10 121.52(14) . . ?
C12 C11 C10 120.59(14) . . ?
C13 C12 C11 121.12(16) . . ?
C14 C13 C12 119.82(16) . . ?
C15 C14 C13 119.80(16) . . ?
C14 C15 C16 120.32(17) . . ?
C15 C16 C11 121.07(16) . . ?

_refine_diff_density_max    0.166
_refine_diff_density_min   -0.221
_refine_diff_density_rms    0.051

_shelxl_version_number 2013-4

#===END
